# Supplementary material for: Silver nanoparticles confined in carbon nanotubes: on the understanding of the confinement effect and promotional catalysis for the selective hydrogenation of dimethyl oxalate
Source: Royal Society of Chemistry journal article supplement (doi:10.1039/c5nr08651e), 2016-01-01
Supplement: c5nr08651e1.pdf [file c5nr08651e1.pdf]

## Supporting Information

### Silver Nanoparticles Confined in Carbon Nanotubes: On the Understanding of Confinement Effect and Promotional Catalysis for the Selective Hydrogenation of Dimethyl Oxalate

Jianwei Zheng, Xinping Duan,\* Haiqiang Lin, Zhengqiang Gu, Huihuang Fang, Jianhui Li, and Youzhu Yuan\*

State Key Laboratory for Physical Chemistry of Solid Surfaces, National Engineering Laboratory for Green Chemical Productions of Alcohols-Ethers-Esters, Collaborative Innovation Center of Chemistry for Energy Materials, College of Chemistry and Chemical Engineering, Xiamen University, Xiamen 361005, P.R. China

<sup>a</sup> Determined by ICP-OES analysis. <sup>b</sup> Determined by N<sub>2</sub>O surface oxidation.

<sup>c</sup> Determined by TEM.

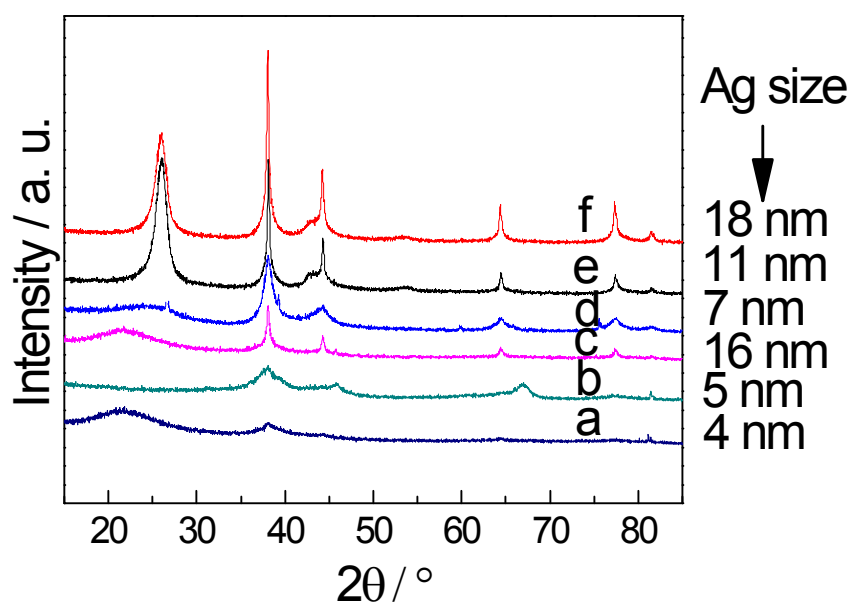

**Fig. S1.** XRD patterns and Ag crystallite size of (a) Ag/H<sub>2</sub>SiO<sub>3</sub>; (b) Ag/γ-Al<sub>2</sub>O<sub>3</sub>; (c) Ag/SiO<sub>2</sub>; (d) Ag/AC; (e) Ag-out/hCNT; (f) Ag-in/hCNT.
